# Supplementary material
Source: Springer Nature journal article supplement (https://www.springermedizin.de/resource/supplementary/12939_2013_374_MOESM1_ESM.pdf/9551012)
Supplement: MOESM1 [file 9551012]

## Comparative analysis of data

Identify  
specific  
segments of  
information

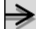

Initial  
reading  
through  
text

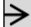

Label the  
segments of  
information  
to create  
categories

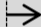

## Theoretical comparative analysis

Refinement  
of the  
categories  
&  
determining  
central  
category

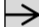

Integration  
of  
categories  
to create a  
theoretical  
model
